# Supplementary material
Source: Springer Nature journal article supplement (https://www.springermedizin.de/resource/supplementary/12913_2009_1107_MOESM1_ESM.pdf/9536376)

**A**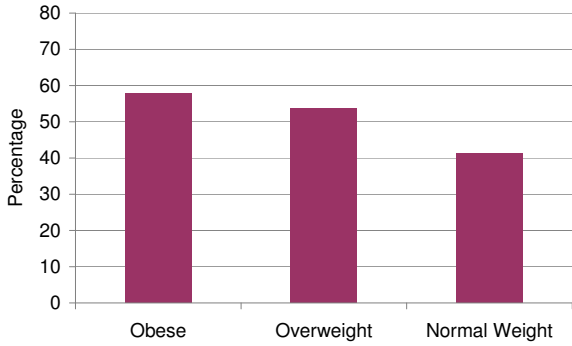**D**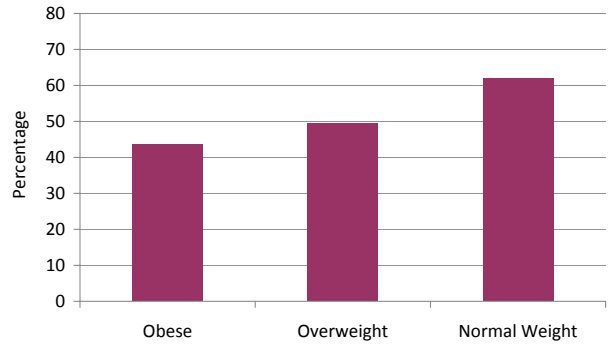**B**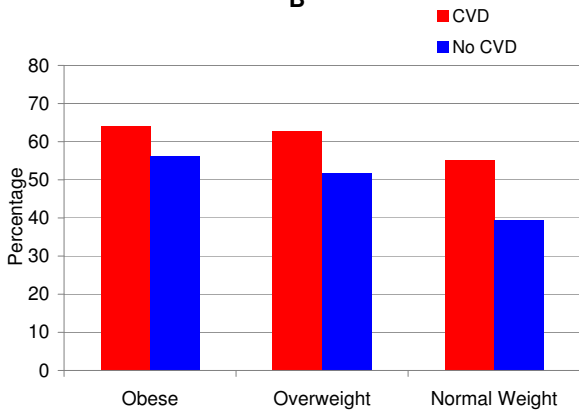**E**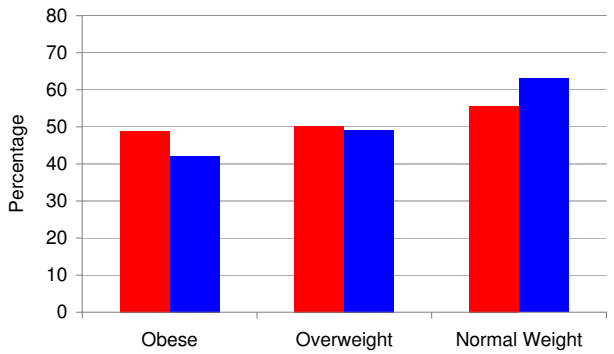**C**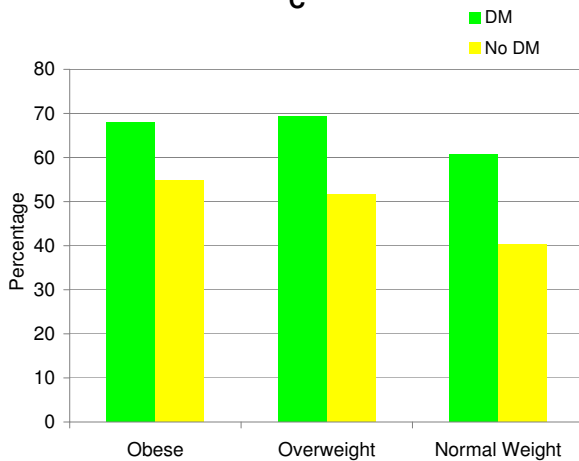**F**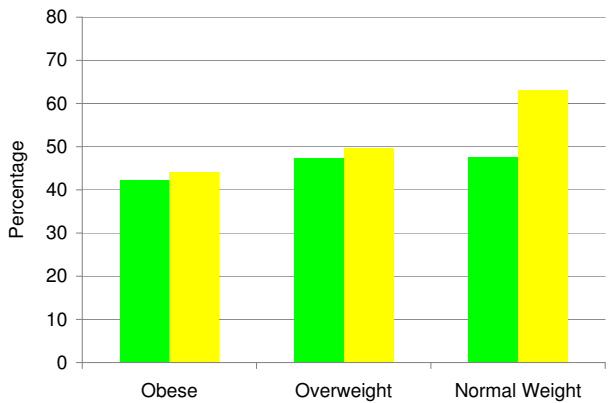

Supplement: MOESM1 [file 9536376]
